# Supplementary material for: Genetic Diversity of Wild and Cultivated Muscadine Grapes (Vitis rotundifolia Michx.)
Source: Front Plant Sci. 2022 Mar 28;13:852130. doi: 10.3389/fpls.2022.852130 (PMC8996184; doi:10.3389/fpls.2022.852130)
Supplement: Supplementary Table 1 — Accession name, population, year of release (when applicable), and source of tissue for the 194 accessions used in this study. Included are the structure proportional assignments to each cluster at K = 5 and the coordinates of the first two principal components. [file Data_Sheet_1.xlsx]

## Sheet: Supplemental Table 1
Supplemental Table 1: Accession name, population, year of release (when applicable), and source of tissue for the 194 accessions used in this study. Included are the structure proportional assignments to each cluster at K=5 and the coordinates of the first two principal components.
Genotype	Population	Year released	Germplasm sourcez	Cluster 1	Cluster 2	Cluster 3	Cluster 4	Cluster 5	Principal component 1	Principal component 2
ALA-1	ALA	na	Wild	0.001	0.002	0.996	0.001	0.001	4.43268	-1.25691
ALA-10	ALA	na	Wild	0.001	0	0.998	0	0	4.69545	-0.511629
ALA-2	ALA	na	Wild	0.007	0.011	0.972	0.003	0.008	3.74397	-0.797817
ALA-3	ALA	na	Wild	0.001	0	0.998	0.001	0	5.17944	-1.35413
ALA-4	ALA	na	Wild	0.001	0.001	0.997	0.002	0	3.84737	-1.15069
ALA-5	ALA	na	Wild	0	0	0.999	0	0	4.55932	-0.910488
ALA-6	ALA	na	Wild	0.002	0.001	0.994	0.001	0.002	3.77727	-0.980968
ALA-7	ALA	na	Wild	0.001	0	0.998	0	0	4.55874	-0.825652
ALA-8	ALA	na	Wild	0	0	0.999	0	0	4.85918	-1.04049
ALA-9	ALA	na	Wild	0	0	0.999	0	0	4.81642	-0.909852
AM135	ARK	na	UA	0	0.999	0	0	0	-7.09004	-4.39938
AM136	ARK	na	UA	0	0.999	0	0	0	-7.06316	-4.31403
AM148	ARK	na	UA	0	0.957	0	0	0.042	-5.71019	-3.6352
AM167	ARK	na	UA	0	0.658	0	0	0.341	-6.0631	-2.30213
AM174	ARK	na	UA	0	0.999	0	0	0	-7.01793	-3.5327
AM175	ARK	na	UA	0	0.999	0	0	0	-6.70425	-3.66938
AM176	ARK	na	UA	0	0.999	0	0	0	-7.16921	-5.1378
AM179	ARK	na	UA	0	0.999	0	0	0	-7.39735	-4.66088
AM183	ARK	na	UA	0	0.999	0	0	0	-6.79919	-4.382
AM186	ARK	na	UA	0	0.999	0	0	0	-7.58385	-5.33466
AM195	ARK	na	UA	0	0.999	0	0	0	-6.9105	-4.82243
AM64	ARK	na	UA	0	0.847	0.001	0.001	0.151	-5.28075	-2.59141
AM77	ARK	na	UA	0	0.447	0	0	0.552	-5.41009	-1.56874
AM83	ARK	na	UA	0	0.997	0	0	0.002	-6.9901	-3.2109
ARK1-1	ARK1	na	Wild	0.003	0	0.996	0	0.001	4.36428	-1.21179
ARK1-10	ARK1	na	Wild	0	0	0.998	0	0	4.73431	-0.887573
ARK1-2	ARK1	na	Wild	0.002	0	0.993	0.001	0.002	4.71398	-1.07253
ARK1-3	ARK1	na	Wild	0.002	0	0.997	0	0	4.48652	-1.38636
ARK1-4	ARK1	na	Wild	0	0	0.999	0	0	4.66008	-1.59848
ARK1-5	ARK1	na	Wild	0.001	0.001	0.997	0	0.001	4.41574	-1.42567
ARK1-6	ARK1	na	Wild	0.009	0	0.99	0.001	0.001	4.42414	-1.11026
ARK1-7	ARK1	na	Wild	0.001	0	0.998	0.001	0	4.52006	-1.12715
ARK1-8	ARK1	na	Wild	0.002	0.001	0.996	0.001	0	4.05928	-1.3058
ARK1-9	ARK1	na	Wild	0	0.001	0.997	0	0.001	4.41401	-1.25782
ARK2-1	ARK2	na	Wild	0.001	0.001	0.996	0.001	0.001	4.69394	-1.76597
ARK2-10	ARK2	na	Wild	0.004	0.002	0.797	0	0.197	2.50491	-1.95655
ARK2-3	ARK2	na	Wild	0	0	0.999	0	0	5.09053	-1.62222
ARK2-5	ARK2	na	Wild	0	0.004	0.993	0	0.001	3.07436	-1.08749
ARK2-6	ARK2	na	Wild	0	0.001	0.998	0	0.001	3.36253	-1.20318
ARK2-7	ARK2	na	Wild	0	0.004	0.8	0	0.195	2.32625	-1.98223
ARK2-8	ARK2	na	Wild	0.001	0	0.998	0	0	5.06408	-1.42846
ARK2-9	ARK2	na	Wild	0.001	0.001	0.998	0	0	4.60378	-2.13767
ARK2-11u	ARK2	na	Wild	0.023	0.001	0.974	0.002	0.001	4.41847	-1.34606
ARK3-1	ARK3	na	Wild	0.001	0.001	0.995	0.001	0.001	1.11331	-0.278344
ARK3-2	ARK3	na	Wild	0.001	0	0.998	0	0	4.66481	-2.02182
ARK3-3	ARK3	na	Wild	0.003	0	0.997	0	0	4.91275	-1.83421
ARK3-5	ARK3	na	Wild	0.001	0	0.998	0.001	0	3.93499	-1.65802
ARK4-1	ARK4	na	Wild	0	0	0.999	0	0	5.49248	-1.32351
ARK4-10	ARK4	na	Wild	0	0	0.999	0	0	4.84859	-2.08578
ARK4-2	ARK4	na	Wild	0	0	0.999	0	0	4.76781	-1.77937
ARK4-3	ARK4	na	Wild	0	0	0.999	0	0	5.33972	-1.56975
ARK4-4	ARK4	na	Wild	0	0.001	0.998	0	0.001	5.20369	-1.82359
ARK4-5	ARK4	na	Wild	0	0	0.999	0	0	5.08416	-2.11316
ARK4-6	ARK4	na	Wild	0	0	0.999	0	0	4.77353	-2.01054
ARK4-7	ARK4	na	Wild	0	0	0.999	0	0	5.27361	-2.18474
ARK4-8	ARK4	na	Wild	0	0	0.999	0	0	5.27752	-0.836283
ARK4-9	ARK4	na	Wild	0	0	0.999	0	0	4.78228	-1.79413
ARK5-12y	ARK5	na	Wild	0.001	0	0.998	0	0.001	4.67988	-1.21792
ARK5-7	ARK5	na	Wild	0.001	0	0.999	0	0	4.54297	-1.0428
ARK5-8	ARK5	na	Wild	0	0	0.999	0	0	5.48583	-1.39447
ARK5-9	ARK5	na	Wild	0	0	0.999	0	0	5.82404	-1.75694
ARK5-1	ARK5	na	Wild	0	0	0.999	0	0	5.41688	-1.47672
ARK5-2	ARK5	na	Wild	0	0	0.999	0	0	6.22673	-2.06645
ARK5-3x	ARK5	na	Wild	0.001	0	0.469	0.529	0.001	2.21033	3.01421
ARK5-4	ARK5	na	Wild	0	0	0.999	0	0.001	5.37895	-1.38248
ARK5-5	ARK5	na	Wild	0	0	0.999	0	0	5.53954	-1.52379
ARK5-6	ARK5	na	Wild	0	0	0.999	0	0	5.08623	-2.10561
ARK5-10y	ARK5	na	Wild	0	0	0.999	0	0	5.21983	-1.34375
ARK5-11y	ARK5	na	Wild	0	0.001	0.998	0	0	4.60189	-1.20211
ARK5-13y	ARK5	na	Wild	0.001	0	0.998	0	0	5.57943	-1.277
FLA-1	FLA	na	Wild	0	0.001	0.001	0.997	0.001	-1.46395	7.12663
FLA-10	FLA	na	Wild	0.011	0.002	0.001	0.983	0.003	-1.88897	6.94272
FLA-2	FLA	na	Wild	0.001	0.001	0.001	0.996	0.001	-1.45176	6.50057
FLA-3	FLA	na	Wild	0.001	0.001	0.001	0.997	0.001	-0.896711	5.37913
FLA-4	FLA	na	Wild	0.001	0.003	0.002	0.993	0.001	-1.30395	6.11275
FLA-6	FLA	na	Wild	0.001	0	0.001	0.998	0	-0.767878	7.46223
FLA-7	FLA	na	Wild	0.002	0	0	0.997	0	-0.92715	7.64272
FLA-11w	FLA	na	Wild	0	0.001	0.001	0.997	0.001	-1.06466	6.46946
FLA-12w	FLA	na	Wild	0.006	0.005	0.022	0.943	0.024	-0.925908	5.8946
FLA-13w	FLA	na	Wild	0.006	0.001	0.001	0.989	0.002	-0.936048	5.29476
FLA-14w	FLA	na	Wild	0.002	0.001	0.001	0.994	0.002	-1.67052	7.13137
Bountiful	HIS	1967	GRIN_D	0	0.589	0.001	0	0.41	-5.08371	-1.75937
Brownie	HIS	1933	GRIN_D	0.001	0.149	0	0.119	0.731	-5.33753	0.641974
Chief	HIS	1967	GRIN_D	0	0.002	0	0	0.998	-5.62838	-1.3912
Chowan	HIS	1962	UGA	0	0.455	0.055	0.058	0.432	-4.83287	-1.01722
Cowart	HIS	1968	UGA	0	0.997	0	0	0.002	-5.35697	-2.27173
Dawn	HIS	1938	UGA	0	0.002	0	0	0.997	-5.87856	-1.46093
Dearing	HIS	1957	JB	0.001	0.54	0.063	0.161	0.236	-2.77681	-0.616533
Higgins	HIS	1955	UGA	0	0.806	0.001	0	0.193	-5.63254	-1.91635
Irene	HIS	1919	GRIN_D	0	0.001	0	0	0.999	-4.23843	0.16405
LaSalle	HIS	1908	UGA	0	0	0	0	0.999	-4.25261	0.897613
Magnolia	HIS	1962	UGA	0	0.385	0.001	0.001	0.613	-6.08885	-1.56021
Magoon	HIS	1959	UGA	0.001	0.629	0.134	0.011	0.226	-2.70753	-1.15639
November	HIS	1920	GRIN_D	0.003	0.339	0.022	0.183	0.453	-3.72026	0.168782
Onslow	HIS	1946	GRIN_D	0.001	0.474	0.048	0.032	0.445	-4.02392	-1.22244
San-Alba	HIS	1906	GRIN_D	0	0	0	0	0.999	-4.22893	0.827945
San-Jacinto	HIS	1908	UGA	0	0	0	0	0.999	-4.1364	0.933974
San-Rubra	HIS	1906	GRIN_D	0.056	0.15	0.001	0.196	0.597	-1.46907	0.260091
Spaldingv	HIS	1920	GRIN_D	0.038	0.001	0.001	0.961	0	-1.53388	7.42269
Stuckeyv	HIS	1920	GRIN_D	0.017	0.117	0.003	0.468	0.394	-3.61508	3.07287
Tarheel	HIS	1946	UGA	0.001	0.255	0.001	0.274	0.469	-3.96259	1.56477
Topsail	HIS	1946	JB	0	0.582	0.001	0	0.417	-3.62998	-1.78288
Trayshed	HIS	na	UCD	0	0.049	0.057	0.052	0.842	-4.39077	-0.138958
White-male	HIS	na	JB	0	0.169	0.147	0	0.684	-4.44111	-2.05147
Yuga	HIS	1934	UGA	0.002	0.603	0.001	0.146	0.247	-4.44059	-0.183072
MIS-1	MIS	na	Wild	0.666	0	0.333	0.001	0.001	2.18767	2.2411
MIS-10	MIS	na	Wild	0.562	0	0.437	0	0	2.47769	1.3542
MIS-11	MIS	na	Wild	0.463	0.082	0.154	0.001	0.3	-1.66952	0.966591
MIS-12	MIS	na	Wild	0.439	0.002	0.35	0.013	0.197	0.169814	1.74078
MIS-2	MIS	na	Wild	0.505	0.001	0.396	0.01	0.088	1.99417	2.23031
MIS-3	MIS	na	Wild	0.426	0.003	0.339	0.001	0.23	0.17852	1.16275
MIS-4	MIS	na	Wild	0.668	0.001	0.182	0.001	0.147	0.187674	2.35151
MIS-5	MIS	na	Wild	0.493	0.001	0.319	0	0.187	0.448129	1.27998
MIS-6	MIS	na	Wild	0.52	0	0.479	0.001	0	2.82959	1.75769
MIS-7	MIS	na	Wild	0.468	0.011	0.378	0.001	0.142	0.613111	0.952281
MIS-9	MIS	na	Wild	0.338	0.013	0.397	0.001	0.251	0.105175	0.109077
Barrett-Mtn	MUS	na	UGA	0.017	0.008	0.001	0.972	0.001	-1.6732	7.02881
DVIT2242	MUS	na	GRIN_D	0.002	0	0	0.996	0.001	-1.96133	8.35581
DVIT2248	MUS	na	GRIN_D	0.084	0.002	0.238	0.675	0.001	0.41476	4.45973
Fennels-3-way-hybrid	MUS	na	UGA	0.25	0.223	0	0.506	0.02	-2.4258	4.53855
Marsh	MUS	na	UGA	0.008	0.024	0.003	0.939	0.026	-1.35899	5.27665
Thornhill	MUS	na	UGA	0.001	0	0	0.998	0.001	-2.08553	8.39863
V-popenoei	MUS	na	UGA	0.453	0.001	0.001	0.545	0.001	0.0936372	5.28975
NC1-1	NC1	na	Wild	0.001	0.001	0.006	0.805	0.187	-0.647177	4.28972
NC1-10	NC1	na	Wild	0	0.001	0.013	0.778	0.208	-0.685439	5.18192
NC1-11	NC1	na	Wild	0	0.001	0.001	0.856	0.143	-1.21576	5.63134
NC1-12	NC1	na	Wild	0.001	0.037	0.184	0.621	0.157	-0.552798	3.04791
NC1-2	NC1	na	Wild	0.001	0.001	0.016	0.857	0.125	-0.703564	5.16402
NC1-3	NC1	na	Wild	0	0.003	0.003	0.922	0.072	-1.32082	5.64913
NC1-4	NC1	na	Wild	0.001	0.039	0.126	0.691	0.143	-0.847194	4.0452
NC1-5	NC1	na	Wild	0	0.001	0.001	0.9	0.097	-1.1992	5.91354
NC1-6	NC1	na	Wild	0.001	0.001	0.078	0.769	0.151	-0.657027	4.86979
NC1-7	NC1	na	Wild	0.002	0.001	0.008	0.845	0.144	-0.722261	5.18697
NC1-8	NC1	na	Wild	0	0.001	0.001	0.728	0.27	-1.90399	4.86448
NC1-9	NC1	na	Wild	0	0.001	0.001	0.791	0.207	-1.42962	5.3153
NC2-1	NC2	na	Wild	0.001	0.19	0.122	0.048	0.638	-4.15687	-1.46936
NC2-10	NC2	na	Wild	0.001	0.003	0.662	0.236	0.099	2.17122	0.275991
NC2-12	NC2	na	Wild	0.001	0.073	0.274	0.043	0.609	-2.13718	-0.346348
NC2-3	NC2	na	Wild	0.004	0.004	0.617	0.23	0.144	1.36955	0.5993
NC2-4	NC2	na	Wild	0.002	0.006	0.66	0.319	0.012	2.18377	0.882029
NC2-6	NC2	na	Wild	0.001	0.015	0.651	0.246	0.088	2.03784	0.654903
NC2-7	NC2	na	Wild	0	0.003	0.632	0.258	0.106	2.06658	0.802058
NC2-8	NC2	na	Wild	0.001	0.003	0.592	0.291	0.113	2.04926	0.874977
NC3-1	NC3	na	Wild	0.001	0.003	0.72	0.167	0.109	2.30413	-0.422627
NC3-2	NC3	na	Wild	0.027	0.054	0.672	0.121	0.126	1.82062	-0.291947
NC3-3	NC3	na	Wild	0.03	0.01	0.783	0.17	0.006	0.82229	-0.0329918
NC3-7	NC3	na	Wild	0.017	0.007	0.692	0.223	0.062	1.92384	0.589141
OKL-1	OKL	na	Wild	0	0	0.999	0	0	4.81514	-0.892681
OKL-2	OKL	na	Wild	0.001	0.001	0.997	0	0.001	4.88619	-1.74183
OKL-3	OKL	na	Wild	0	0	0.999	0	0	4.98412	-1.18117
OKL-4	OKL	na	Wild	0	0	0.999	0	0	4.86679	-1.27025
OKL-5	OKL	na	Wild	0	0	0.998	0	0.001	4.52243	-1.69781
OKL-7	OKL	na	Wild	0.017	0.001	0.98	0.001	0.001	2.46367	-0.601513
OKL-8	OKL	na	Wild	0.001	0	0.998	0	0	3.35378	-0.657264
Black-Fry	REC	1986	UGA	0	0.998	0	0	0.001	-6.7826	-2.87132
Carlos	REC	1970	UGA	0	0.277	0.001	0	0.722	-5.6093	-1.09922
Dixie	REC	1976	UGA	0	0.452	0.001	0.002	0.545	-4.75377	-0.90588
Doreen	REC	1981	UA	0	0.583	0.001	0.001	0.416	-5.29723	-1.16264
Fry-Seedless	REC	1990	UGA	0.001	0.656	0.001	0.102	0.239	-4.74149	-0.659269
Jumbo	REC	1970	UGA	0	0.79	0	0	0.208	-5.07465	-1.92755
Loomis	REC	1989	UGA	0.001	0.636	0.001	0.042	0.32	-4.43472	-0.802281
Nesbitt	REC	1985	UA	0	0.982	0	0	0.017	-6.41584	-3.67926
Noble	REC	1973	GRIN_D	0	0.577	0.08	0.187	0.155	-2.66951	0.279462
Oh-My!	REC	2019	JB	0.136	0.848	0	0.001	0.015	-6.34882	-3.23768
Pride	REC	1972	UGA	0.001	0.996	0.001	0	0.003	-5.49847	-2.43742
Southern-Home	REC	1994	UGA	0	0.999	0	0	0	-5.92258	-3.13915
Southland	REC	1977	UGA	0	0.812	0.029	0.001	0.158	-3.74312	-2.19861
Sterling	REC	1981	UGA	0	0.424	0	0	0.575	-6.70092	-2.15565
Summit	REC	1977	UA	0	0.983	0.001	0	0.015	-6.04908	-3.98037
Supreme	REC	1988	UA	0	0.999	0	0	0.001	-6.85098	-3.08431
Triumph	REC	1980	UGA	0	0.988	0	0	0.011	-3.9811	-1.90606
Welder	REC	1972	UGA	0	0.453	0.001	0.031	0.515	-4.40505	-0.446863
TEN-1	TEN	na	Wild	0	0.001	0.997	0	0.001	4.08065	-1.56059
TEN-10	TEN	na	Wild	0.007	0.007	0.969	0.002	0.016	4.05528	-1.20127
TEN-2	TEN	na	Wild	0.001	0	0.998	0	0.001	4.55858	-1.74554
TEN-3	TEN	na	Wild	0.001	0.001	0.997	0.001	0.001	4.80412	-0.564721
TEN-4	TEN	na	Wild	0.001	0.007	0.991	0	0.001	3.24366	-1.32632
TEN-5	TEN	na	Wild	0.001	0.005	0.99	0.001	0.002	3.90944	-1.50709
TEN-6	TEN	na	Wild	0.002	0.002	0.992	0.001	0.003	3.93695	-0.787689
TEN-7	TEN	na	Wild	0.011	0.002	0.985	0.001	0.001	4.00995	-1.3593
TEN-8	TEN	na	Wild	0	0.003	0.995	0.001	0.001	3.7684	-1.93954
TEN-9	TEN	na	Wild	0	0.001	0.996	0.001	0.003	4.80526	-1.44581
TEX-1	TEX	na	Wild	0.003	0.001	0.974	0.02	0.002	4.18785	-0.791785
TEX-10	TEX	na	Wild	0.005	0.005	0.988	0.001	0.001	4.36072	-1.07677
TEX-2	TEX	na	Wild	0.007	0.002	0.98	0.007	0.003	1.17665	-0.439706
Creswell	VAR	1946	GRIN_D	0	0.001	0	0	0.999	-3.6038	-0.218757
Flowers	VAR	1816	GRIN_D	0.001	0.298	0.226	0.343	0.132	-1.02346	1.31497
James	VAR	1866	GRIN_D	0	0	0	0	0.999	-3.97625	0.812768
Latham	VAR	1855	JB	0	0.319	0.083	0.101	0.497	-4.2692	-0.877272
Memory	VAR	1868	GRIN_D	0.001	0.154	0.099	0.145	0.601	-3.84415	-0.057748
Scuppernong	VAR	na	UGA	0	0.134	0	0	0.865	-7.09313	-2.04965
Thomas	VAR	1845	UCD	0.001	0.765	0.186	0.041	0.008	-1.85594	-0.96328
Unknown-male-1	VAR	na	UGA	0.001	0.331	0.002	0.009	0.658	-4.54896	-0.617586
Unknown-male-2	VAR	na	UGA	0	0	0	0	0.999	-4.15952	0.0102737
zUA = University of Arkansas, UGA = University of Georgia, GRIN_D = National Clonal Germplasm Repository at Davis, California, UCD = University of California at Davis, JB = Jeff Bloodworth, "Gardens Alive!", Wild = wild accession collected de novo.
yAccessions that were collected outside the 1 km range set for a wild population in this study. Each accession was collected from the same geographic region as ARK5, the Arkansas Ozarks, and therefore added to the ARK5 population.
xThe genotype of ARK5-3 is presumed to be the result of a plating error and was not included in population-level statistics.
wA second population from Florida was collected for this study, but low quality marker data resulted in only four accessions being included in the final dataset. Only 25.1 km separated the two Florida populations, therefore the two populations were combined.
vThe tissue received for 'Spalding' and 'Stuckey' was determined to be inaccurate and not included in population-level statistics.
uA single accession was collected in the Ouachita Mountains of Arkansas outside of the 1 km range for a population in this study. This accession was added to ARK2, the closest wild population.
